# Supplementary material for: Epigenetic Regulation of Pluripotent Genes Mediates Stem Cell Features in Human Hepatocellular Carcinoma and Cancer Cell Lines
Source: PubMed Central journal article supplement (PMC3762826; doi:10.1371/journal.pone.0072435), 2013-09-04

# Supporting figures

## Figure S1

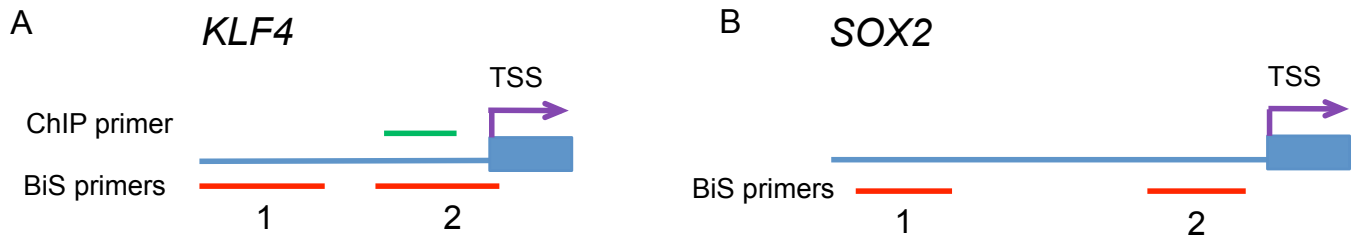

## Figure S2

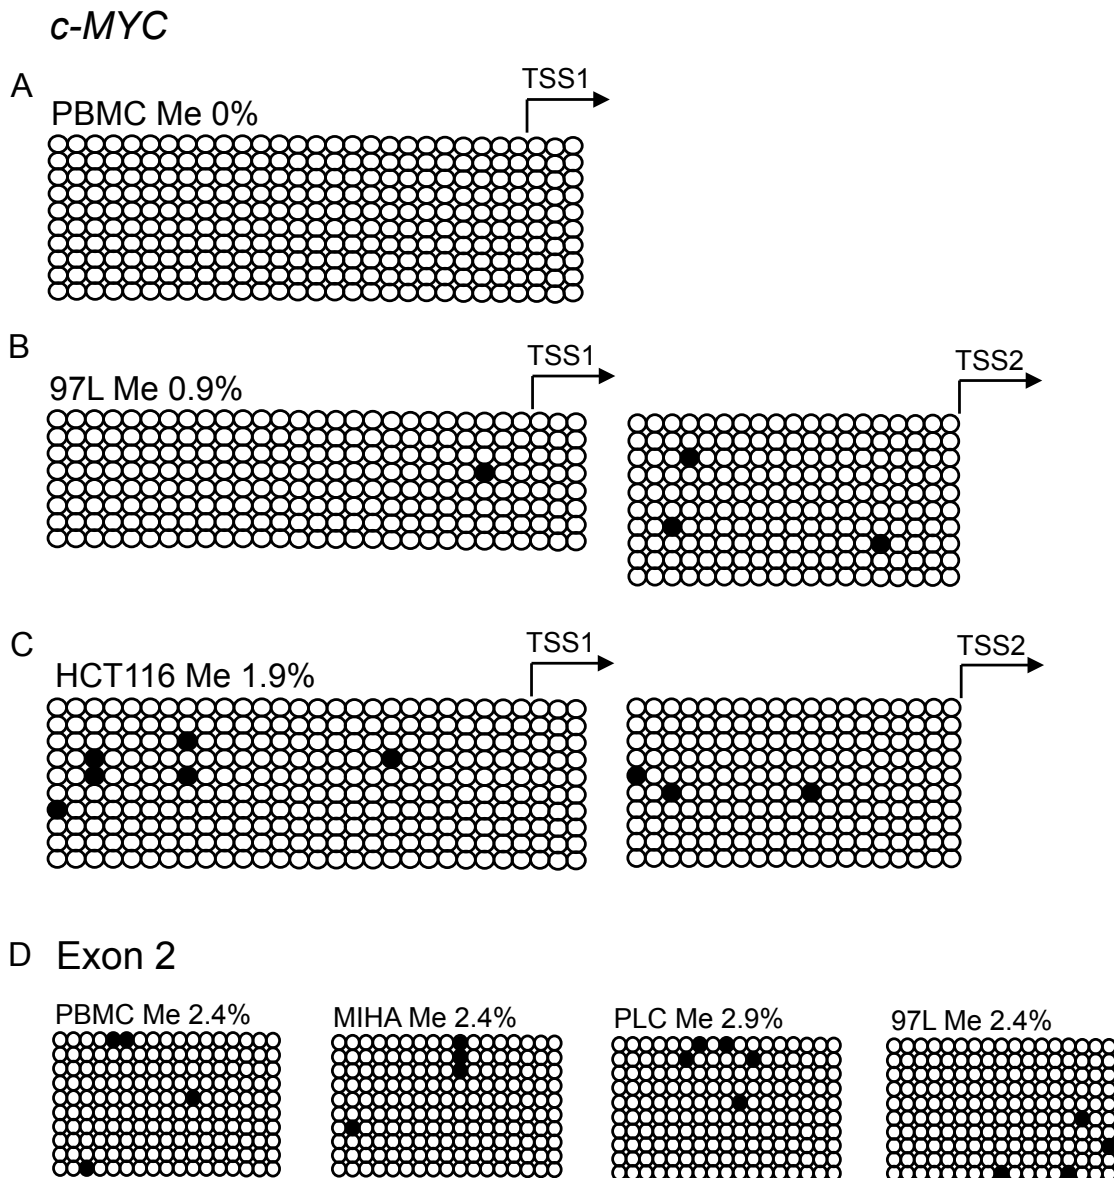

**Figure S3**

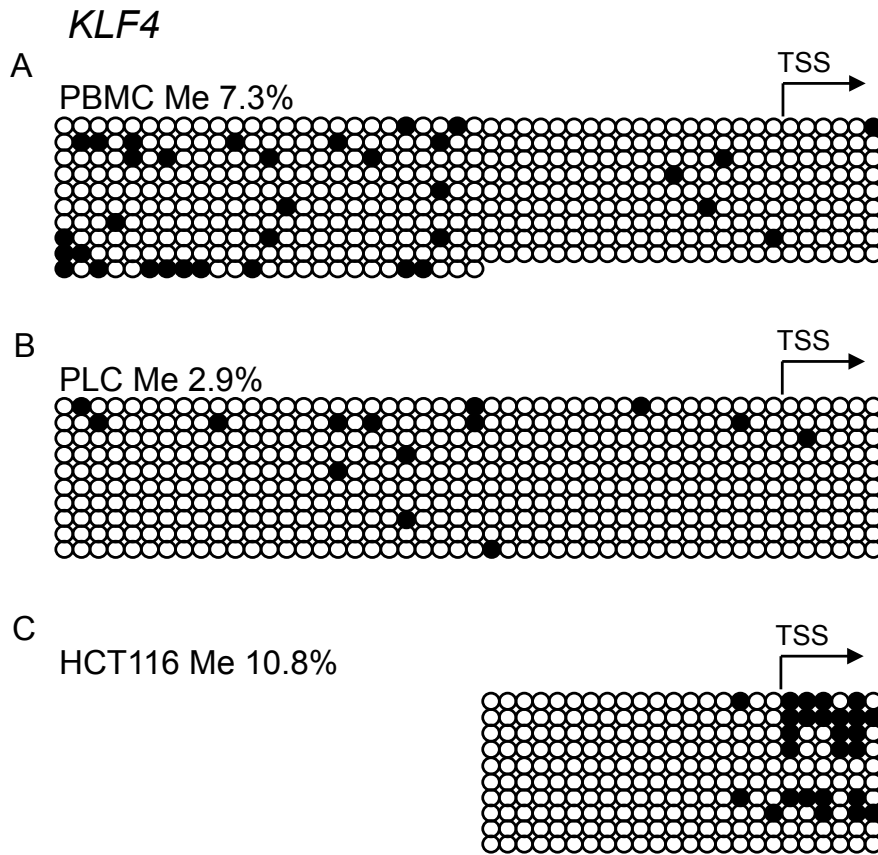

**Figure S4**

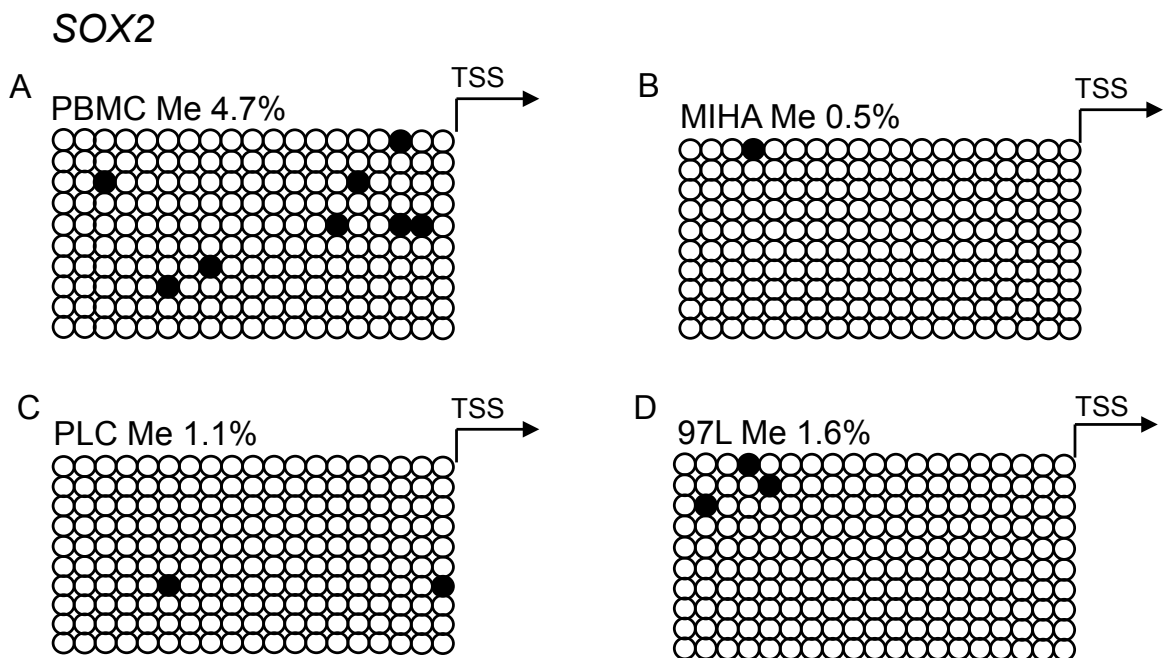

**Figure S5**

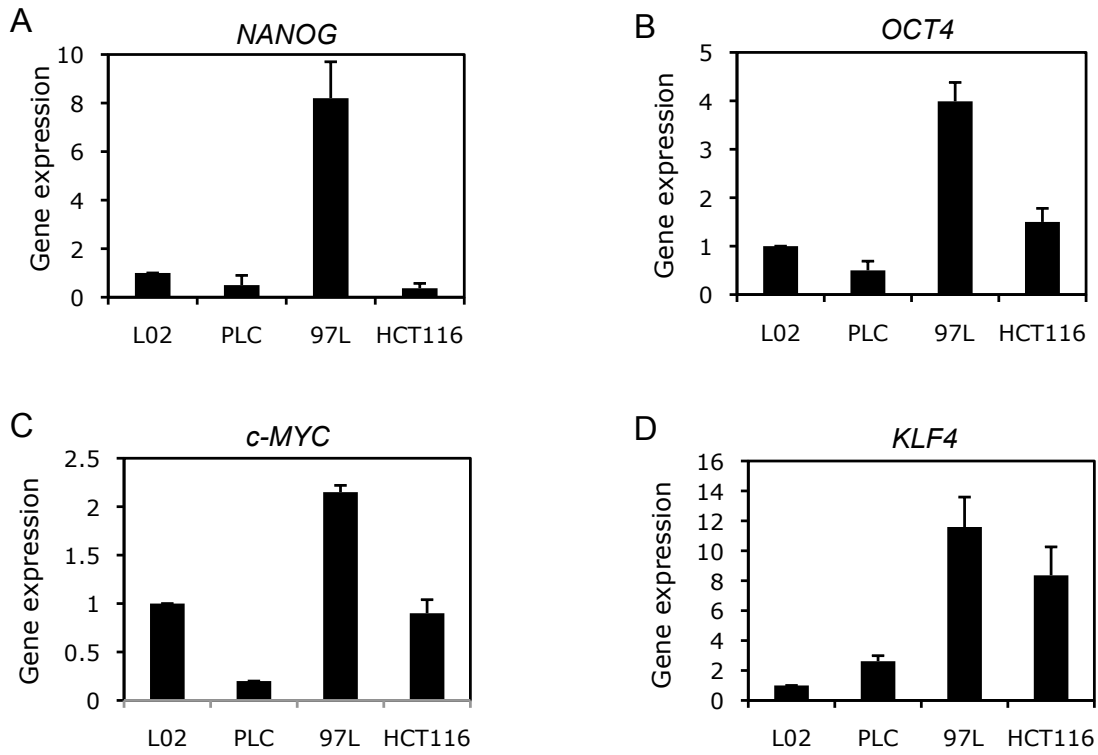

**Figure S6**

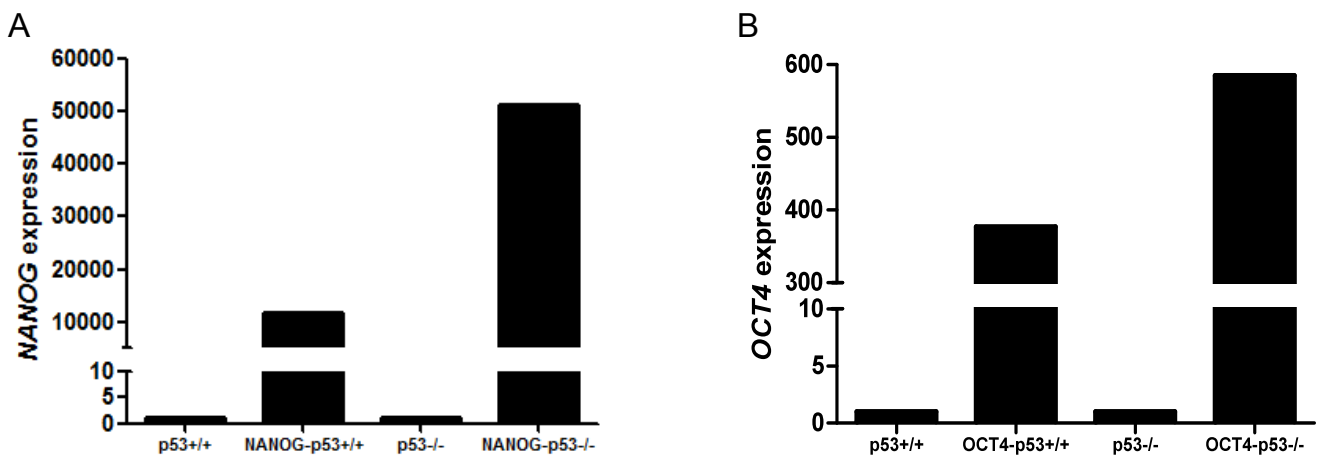

Supplement: pone.0072435.s001.pdf [file pone.0072435.s001.pdf]
